# Supplementary material for: Adaptation and psychometric evaluation of the breastfeeding self-efficacy scale to assess exclusive breastfeeding
Source: PubMed Central journal article supplement (PMC6380059; doi:10.1186/s12884-019-2217-7), 2019-02-18
Supplement: 12884_2019_2217_MOESM1_ESM.pdf [file 12884_2019_2217_MOESM1_ESM.pdf]

**Table S1.**

Prompt: "I have some questions about how you feel about exclusively breastfeeding your baby. Tell me how you would rank your confidence on a scale of 1 to 5 for each situation. There is no right or wrong answer."

| 1 Month Label   | 3 Month Label    | Variable Label                | Items                                                                                                                       |
|-----------------|------------------|-------------------------------|-----------------------------------------------------------------------------------------------------------------------------|
| D2A9            | D2A10            | Enough Milk                   | I can always determine that my baby is getting enough milk*                                                                 |
| <del>D2B9</del> | <del>D2B10</del> | <del>Challenging Tasks</del>  | <del>I can always successfully cope with exclusive breastfeeding like I have with other challenging tasks*</del>            |
| D2C9            | D2C10            | EBF Milk                      | I can always give my baby only breast milk without using animal milk, formula, or other liquids or foods as a supplement**  |
| <del>D2D9</del> | <del>D2D10</del> | <del>Baby Latched</del>       | <del>I can always ensure that my baby is properly latched on for the whole feeding*</del>                                   |
| <del>D2E9</del> | <del>D2E10</del> | <del>Manage BF</del>          | <del>I can always manage the breastfeeding situation to my satisfaction*</del>                                              |
| <del>D2F9</del> | <del>D2F10</del> | <del>BF Baby crying</del>     | <del>I can always manage to breastfeed even if my baby is crying*</del>                                                     |
| D2G9            | D2G10            | Continue EBF                  | I can continue exclusively breastfeeding for as long as I want**                                                            |
| <del>D2H9</del> | <del>D2H10</del> | <del>BF Family members</del>  | <del>I can always comfortably breastfeed with my family members present*</del>                                              |
| D2I9            | D2I10            | Satisfy BF                    | I can always be satisfied with my breastfeeding experience*                                                                 |
| D2J9            | D2J10            | Deal BF                       | I can always deal with the fact that breastfeeding can be time consuming*                                                   |
| <del>D2K9</del> | <del>D2K10</del> | <del>Finish feeding</del>     | <del>I can always finish feeding my baby on one breast before switching to the other breast*</del>                          |
| D2L9            | D2L10            | BF Every feeding              | I can always continue to breastfeed my baby for every feeding*                                                              |
| D2M9            | D2M10            | Keep Bf demands               | I can always manage to keep up with my baby's breastfeeding demands*                                                        |
| <del>D2N9</del> | <del>D2N10</del> | <del>Finished BF</del>        | <del>I can always tell when my baby is finished breastfeeding*</del>                                                        |
| <del>D2O9</del> | <del>D2O10</del> | <del>BF Baby hunger</del>     | <del>I can always make enough breast milk to satisfy my baby's hunger***</del>                                              |
| <del>D2P9</del> | <del>D2P10</del> | <del>Quality breastmilk</del> | <del>I can always make good quality breast milk that has everything that my baby needs to grow well and be healthy***</del> |
| <del>D2Q9</del> | <del>D2Q10</del> | <del>Make decisions</del>     | <del>I can always make decisions about how my baby is being fed***</del>                                                    |
| D2R9            | D2R10            | EBF Liquid                    | I can always exclusively breastfeed without my baby receiving even a drop of water or any other liquid***                   |

Prompt: “I have some questions about how you feel about exclusively breastfeeding your baby. Tell me how you would rank your confidence on a scale of 1 to 5 for each situation. There is no right or wrong answer.”

| 1 Month Label | 3 Month Label | Variable Label   | Items                                                                                                                                                                                                                          |
|---------------|---------------|------------------|--------------------------------------------------------------------------------------------------------------------------------------------------------------------------------------------------------------------------------|
| D2S9          | D2S10         | Stop Other foods | I can always stop someone from trying to feed my baby liquids or foods other than breast milk, including purchased baby foods (e.g. infant formula, milk, porridge, juice, tea [whatever is given]), before 6 months of age*** |

Notes: \*Questions directly adapted from the Breastfeeding Self-Efficacy Scale-Short Form, \*\*Questions modified from the Breastfeeding Self-Efficacy Scale-Short Form, \*\*\*Newly developed questions; Response categories are 1=Not at all confident, 2=Not very confident, 3=Sometimes confident, 4=Confident, 5=Very confident; Items struck through were dropped after item correlations and factor analysis.
