# Supplementary material for: Adaptation and psychometric evaluation of the breastfeeding self-efficacy scale to assess exclusive breastfeeding
Source: PubMed Central journal article supplement (PMC6380059; doi:10.1186/s12884-019-2217-7), 2019-02-18
Supplement: 12884_2019_2217_MOESM2_ESM.pdf [file 12884_2019_2217_MOESM2_ESM.pdf]

Fig S1.
