# Supplementary material for: Adaptation and psychometric evaluation of the breastfeeding self-efficacy scale to assess exclusive breastfeeding
Source: PubMed Central journal article supplement (PMC6380059; doi:10.1186/s12884-019-2217-7), 2019-02-18
Supplement: 12884_2019_2217_MOESM3_ESM.pdf [file 12884_2019_2217_MOESM3_ESM.pdf]

**Table S2.**

|                        | M.I.  | E.P.C. | Std E.P.C. | StdYX E.P.C |
|------------------------|-------|--------|------------|-------------|
| <b>WITH STATEMENTS</b> |       |        |            |             |
| D2L10 WITH D2M10       | 19.49 | 0.33   | 0.33       | 1.73        |
| D2S10 WITH D2R10       | 13.94 | 0.23   | 0.23       | 0.56        |

**Notes:** M.I.=Modification indices; E.P.C.=expected unstandardized parameter change; Std E.P.C.=expected standardized parameter change; Std E.P.C.=fully standardized loading; D2S10 = Stop Other foods; D2R10=EBF Liquid; D2L10=BF Every feeding; D2M10=Keep Bf demands
