# Supplementary material for: Adaptation and psychometric evaluation of the breastfeeding self-efficacy scale to assess exclusive breastfeeding
Source: Springer Nature journal article supplement (doi:10.1186/s12884-019-2217-7), 2019-02-18
Supplement: MOESM5 [file 16488754]

**Table S4.**

| Measures                                    | $\chi^2$ | <i>df</i> | RMSEA | CFI  | TLI  | WRMR | $\rho$  | [95%CI]        |
|---------------------------------------------|----------|-----------|-------|------|------|------|---------|----------------|
| <b>BSES-EBF and EBFSS</b>                   |          |           |       |      |      |      |         |                |
| Cognitive BSES-EBF and Instrumental EBFSS   | 24.877*  | 13        | 0.06  | 0.99 | 0.99 | 0.61 | 0.09    | [-0.05,0.23]   |
| Cognitive BSES-EBF and Informational EBFSS  | 53.052*  | 26        | 0.07  | 0.99 | 0.98 | 0.80 | 0.23*** | [0.10, 0.36]   |
| Cognitive BSES-EBF and Emotional EBFSS      | 119.892* | 53        | 0.07  | 0.98 | 0.97 | 0.94 | 0.28*** | [0.16, 0.40]   |
| Functional BSES-EBF and Instrumental EBFSS  | 77.183*  | 19        | 0.11  | 0.98 | 0.97 | 1.00 | 0.30*** | [0.18, 0.43]   |
| Functional BSES-EBF and Informational EBFSS | 98.200*  | 34        | 0.09  | 0.97 | 0.97 | 0.99 | 0.39*** | [0.28, 0.50]   |
| Functional BSES-EBF and Emotional EBFSS     | 268.087* | 64        | 0.12  | 0.94 | 0.94 | 1.37 | 0.47*** | [0.38, 0.57]   |
| <b>BSES-EBF and CESD Score</b>              |          |           |       |      |      |      |         |                |
| Cognitive BSES-EBF and Depression           | 806.935* | 251       | 0.09  | 0.87 | 0.85 | 1.60 | -0.09   | [-0.24, 0.05]  |
| Functional BSES-EBF and Depression          | 1098.63* | 274       | 0.11  | 0.81 | 0.81 | 1.90 | -0.14** | [-0.28, -0.01] |

**Notes:** **BSES-EBF**= Breastfeeding Self-Efficacy Scale to Measure Exclusive Breastfeeding; **EBFSS**=Exclusive Breastfeeding Social Support;  $\chi^2$  = chi-square goodness of fit statistic;  $\chi^2$ : *df* ratio of less than 3:1; *df*=degrees of freedom; **RMSEA ( $\leq 0.08$ )** = Root Mean Square Error of Approximation; **CFI ( $\geq 0.95$ )**=Comparative Fit Index; **TLI ( $\geq 0.95$ )**=Tucker Lewis Index; **SRMR( $\leq 0.08$ )** =Standardized Square Root Mean Residual; **WRMR ( $\leq 1.0$ )**=Weighted Root Mean Square Residual;  $\rho$  = Rho=population correlation between two latent variables; CI: Confidence Interval; \*All goodness-of-fit tests were statistically significant at  $p < 0.001$ ; \*\*discriminant correlation estimate significant at  $p < 0.5$ ; \*\*\*discriminant correlation estimate significant at  $p < 0.0001$
